# Supplementary material
Source: PubMed Central journal article supplement (PMC3034442)
Supplement: NIHMS264812-supplement-2.pdf [file NIHMS264812-supplement-2.pdf]

## SUPPLEMENTARY MATERIAL

### Supplemental Methods

GC-MS Metabolomic profiling: Thirty  $\mu\text{l}$  of each plasma sample was extracted and derivatized as reported previously (38). Briefly, 15  $\mu\text{l}$  aliquots were extracted into 1 ml of degassed acetonitrile:isopropanol:water (3:3:2) at  $-20^{\circ}\text{C}$ , centrifuged and decanted, with subsequent evaporation of the solvent to dryness. A clean-up step with acetonitrile/water (1:1) was used to remove membrane lipids and triglycerides, and the supernatant was dried. Internal standards of C8-C30 FAMES were added, and the sample was derivatized with methoxyamine hydrochloride in pyridine and, subsequently, by MSTFA (1 ml bottles, Sigma-Aldrich, St. Louis, MO) for trimethylsilylation of acidic protons.

A Gerstel MPS2 automatic liner exchange system was used to inject 1  $\mu\text{l}$  of sample at  $50^{\circ}\text{C}$  (ramped by to  $250^{\circ}\text{C}$ ) in splitless mode with 25 s splitless time. An Agilent 6890 gas chromatograph (Santa Clara, CA) was used with a 30 m, 0.25 mm i.d. Rtx5Sil-MS column with 0.25  $\mu\text{m}$  5% diphenyl film and an additional 10 m integrated guard column was used (Restek, Bellefonte, PA). Chromatography was performed at a constant flow of 1 ml/min, ramping the oven temperature from  $50^{\circ}\text{C}$  to  $330^{\circ}\text{C}$  with a 22 min total run time. Mass spectrometry was conducted by a Leco Pegasus IV time of flight mass spectrometer with a  $280^{\circ}\text{C}$  transfer line temperature, electron ionization at  $-70\text{V}$  and an ion source temperature of  $250^{\circ}\text{C}$ . Mass spectra were acquired from  $m/z$  85-500 at 20 spectra  $\text{s}^{-1}$  and 1750 V detector voltage. Result files were processed further using the UC Davis Metabolomics BinBase database. All database entries in BinBase (38) were matched against a mass spectral library of 1,200 authentic metabolite spectra using retention index, mass spectrum information and the NIST05 commercial library. Identified

metabolites were reported if present in at least 50% of the samples per study design group (as defined in the SetupX database) (39). Quantitative data were normalized to the summed intensities of all known metabolites, and those data were used for statistical analyses.

SNP selection for genotyping: SNP genotype data from unrelated Caucasian subjects (N=168) were downloaded from the HapMap (<http://www.hapmap.org>, data Rel 27/phase II + III). This data was combined with in-house derived (Illumina 550K and 510S genome-wide SNPs) and the Coriell Institute- derived (Affymetrix 6.0 genome-wide SNPs) genotypes generated for 96 samples from Caucasian Americans included in the Coriell Institute's "Human Variation Panel" lymphoblastoid cell lines (Camden, NJ). Tag SNPs were selected using LD select program (source). SNPs between +/- 10 kb of flanking sequence for each gene were tagged utilizing an  $r^2$  threshold of 0.9 and a minimum allele frequency of 5%. Between 10-20 kb of 5' and 3'-flanking sequence, tags were selected based on an  $r^2$  of 0.8 and no singleton SNPs were selected. The SNPs genotyped were chosen to include nonsynonymous variants, SNPs required to fill in large physical gaps, and additional SNPs to add redundancy for larger SNP bins. SNP selection was prioritized to those SNPs with the highest Illumina SNP score for greatest chance of assay success.

Genotyping data quality control (QC) assessment: QC was performed to examine SNP call rates, sample call rates, discordance of duplicate samples, Mendelian errors from the CEPH trio controls included, departure from Hardy-Weinberg Equilibrium (HWE) and distribution of minor allele frequency (MAF). SNPs with low MAFs ( $\leq 0.01$ ), those that failed during genotyping, SNPs with low call rates ( $\leq 0.95$ ), or those with significant departures from HWE ( $\leq 0.001$ ) were

excluded from the analysis. Study subject(s) with DNA samples that failed during genotyping or with low sample call rates ( $\leq 0.95$ ) were also removed. Because of the low percentage of samples from other ethnicities, these analyses were limited to self-reported Non-Hispanic White subjects who were enrolled in the Mayo-PGRN SSRI study.

Sanger resequencing for fine mapping: The rs10975641 SNP is located within an LD desert that spans 11.5 Kb. Four *GLDC* exons (exons 17-20) reside within this region, with rs10975641 located in intron 17. We set out to resequence 2.2 kb upstream, including exon 17, and 3.6 kb downstream, including exons 18-20, to identify any additional SNPs that might be linked to rs10975641. Not knowing which allele of rs10975641 (G/C) might be linked to an unknown functional variant or which group this unknown variant might be enriched in, responders vs. non-responders, we resequenced equal proportions of homozygous GG (N=48) and CC (N=48) samples and equal proportions of responders (N=48) and non-responders (N=48) a total of 96 samples from the Mayo-PGRN SSRI study. PCR conditions as well as PCR and sequencing primers sequences are available on request. Amplicons were sequenced in both directions in Mayo's Molecular Biology Core Facility using BigDye dye terminator sequencing chemistry (Perkin-Elmer Life and Analytical science, Boston, MA) with an ABI3700 DNA sequencer (Applied Biosystems). Sequencing chromatograms were analyzed using Mutation Surveyor 2.51 (Soft Genetics, LLC., State College, PA).

| Remission (last visit, 8 week or 4 week if 8 week missing) |     |               |      |             |       |            |                   |        |                   |         |     |                   | Remission (8 week only) |                   |       |            |                   |       |                   |            |         |        |                      |                    |                      | Response |                    |  |  |          |  |  |  |  |  |  |  |  | Percent Change in QIDS score |  |  |  |  |  |  |  |  |  |  |  |  |
|------------------------------------------------------------|-----|---------------|------|-------------|-------|------------|-------------------|--------|-------------------|---------|-----|-------------------|-------------------------|-------------------|-------|------------|-------------------|-------|-------------------|------------|---------|--------|----------------------|--------------------|----------------------|----------|--------------------|--|--|----------|--|--|--|--|--|--|--|--|------------------------------|--|--|--|--|--|--|--|--|--|--|--|--|
| rs#                                                        | chr | position (bp) | MAF  | HWE p-value | gene  | Unadjusted |                   |        | Adjusted          |         |     | n                 | Unadjusted              |                   |       | Adjusted   |                   |       | n                 | Unadjusted |         |        | Adjusted             |                    |                      | n        | Unadjusted         |  |  | Adjusted |  |  |  |  |  |  |  |  |                              |  |  |  |  |  |  |  |  |  |  |  |  |
|                                                            |     |               |      |             |       | OR (95%CI) | p-value           | n      | OR (95%CI)        | p-value | n   |                   | OR (95%CI)              | p-value           | n     | OR (95%CI) | p-value           | n     |                   | OR (95%CI) | p-value | n      | Spearman coefficient | unadjusted p-value | Spearman coefficient |          | unadjusted p-value |  |  |          |  |  |  |  |  |  |  |  |                              |  |  |  |  |  |  |  |  |  |  |  |  |
| rs6784820                                                  | 3   | 49425867      | 0.42 | 0.65        | AMT   | 511        | 0.966(0.752,1.24) | 0.79   | 0.970(0.75,1.25)  | 0.435   | 409 | 0.803(0.679,1.17) | 0.417                   | 0.919(0.696,1.21) | 0.552 | 409        | 1.050(0.779,1.4)  | 0.768 | 1.090(0.81,1.48)  | 0.555      | 408     | 0.021  | 0.675                | 0.015              | 0.765                |          |                    |  |  |          |  |  |  |  |  |  |  |  |                              |  |  |  |  |  |  |  |  |  |  |  |  |
| rs8897                                                     | 3   | 49435410      | 0.3  | 1           | AMT   | 509        | 0.938(0.714,1.23) | 0.648  | 0.940(0.714,1.23) | 0.683   | 406 | 1.030(0.758,1.39) | 0.868                   | 1.074(1.36)       | 0.368 | 406        | 0.869(0.629,1.2)  | 0.394 | 0.841(0.606,1.17) | 0.153      | 405     | 0.004  | 0.943                | 0.008              | 0.866                |          |                    |  |  |          |  |  |  |  |  |  |  |  |                              |  |  |  |  |  |  |  |  |  |  |  |  |
| rs10288835                                                 | 7   | 10730166      | 0.17 | 1           | DLG2  | 512        | 0.947(0.679,1.32) | 0.749  | 0.978(0.671,1.37) | 0.897   | 409 | 0.989(0.671,1.43) | 0.954                   | 1.040(0.751,1.51) | 0.844 | 409        | 1.080(0.729,1.61) | 0.692 | 1.140(0.77,1.71)  | 0.533      | 408     | 0.037  | 0.449                | -0.041             | 0.405                |          |                    |  |  |          |  |  |  |  |  |  |  |  |                              |  |  |  |  |  |  |  |  |  |  |  |  |
| rs756383                                                   | 7   | 10731017      | 0.42 | 0.856       | DLG2  | 512        | 1.080(0.851,1.39) | 0.564  | 1.070(0.824,1.38) | 0.628   | 409 | 0.994(0.748,1.32) | 0.966                   | 0.967(0.725,1.29) | 0.817 | 409        | 1.010(0.743,1.37) | 0.964 | 0.985(0.723,1.34) | 0.922      | 408     | -0.015 | 0.766                | -0.008             | 0.865                |          |                    |  |  |          |  |  |  |  |  |  |  |  |                              |  |  |  |  |  |  |  |  |  |  |  |  |
| rs10238021                                                 | 7   | 10731301      | 0.18 | 0.551       | DLG2  | 512        | 1.040(0.76,1.4)   | 0.788  | 1.080(0.78,1.5)   | 0.626   | 409 | 1.090(0.77,1.55)  | 0.616                   | 1.140(0.8,1.63)   | 0.461 | 409        | 1.260(0.856,1.86) | 0.235 | 1.320(0.884,1.96) | 0.17       | 408     | -0.077 | 0.118                | -0.08              | 0.106                |          |                    |  |  |          |  |  |  |  |  |  |  |  |                              |  |  |  |  |  |  |  |  |  |  |  |  |
| rs17496031                                                 | 7   | 107314927     | 0.04 | 0.584       | DLG2  | 512        | 0.999(0.533,1.87) | 0.997  | 1.031(1.88,1)     | 1       | 409 | 1.190(0.59,2.4)   | 0.62                    | 1.190(0.586,2.42) | 0.629 | 409        | 1.410(0.629,3.16) | 0.391 | 1.360(0.601,3.06) | 0.452      | 408     | -0.054 | 0.276                | -0.049             | 0.321                |          |                    |  |  |          |  |  |  |  |  |  |  |  |                              |  |  |  |  |  |  |  |  |  |  |  |  |
| rs4572011                                                  | 7   | 107314338     | 0.18 | 0.88        | DLG2  | 512        | 1.05(0.762,1.45)  | 0.757  | 1.110(0.78,1.53)  | 0.583   | 409 | 1.110(0.78,1.59)  | 0.552                   | 1.170(0.81,1.68)  | 0.598 | 409        | 1.220(0.87,1.81)  | 0.307 | 1.280(0.87,1.92)  | 0.22       | 408     | -0.077 | 0.12                 | -0.08              | 0.108                |          |                    |  |  |          |  |  |  |  |  |  |  |  |                              |  |  |  |  |  |  |  |  |  |  |  |  |
| rs482382                                                   | 7   | 10731433      | 0.13 | 0.546       | DLG2  | 511        | 1.180(0.762,1.83) | 0.576  | 1.180(0.762,1.83) | 0.576   | 408 | 1.180(0.762,1.83) | 0.576                   | 1.180(0.762,1.83) | 0.576 | 408        | 1.180(0.762,1.83) | 0.576 | 1.180(0.762,1.83) | 0.576      | 408     | 0.017  | 0.366                | -0.065             | 0.407                |          |                    |  |  |          |  |  |  |  |  |  |  |  |                              |  |  |  |  |  |  |  |  |  |  |  |  |
| rs1208222                                                  | 7   | 107314443     | 0.4  | 0.231       | DLG2  | 511        | 0.928(0.724,1.19) | 0.559  | 0.918(0.715,1.18) | 0.572   | 408 | 0.969(0.735,1.28) | 0.828                   | 0.968(0.732,1.28) | 0.598 | 408        | 0.855(0.638,1.15) | 0.312 | 0.856(0.634,1.15) | 0.22       | 408     | 0.077  | 0.177                | 0.065              | 0.193                |          |                    |  |  |          |  |  |  |  |  |  |  |  |                              |  |  |  |  |  |  |  |  |  |  |  |  |
| rs6466206                                                  | 7   | 107338994     | 0.42 | 0.928       | DLG2  | 512        | 1.060(0.819,1.37) | 0.662  | 1.060(0.819,1.37) | 0.662   | 409 | 0.994(0.725,1.37) | 0.966                   | 0.994(0.725,1.37) | 0.966 | 409        | 1.010(0.743,1.37) | 0.964 | 0.985(0.723,1.34) | 0.922      | 408     | -0.015 | 0.766                | -0.064             | 0.866                |          |                    |  |  |          |  |  |  |  |  |  |  |  |                              |  |  |  |  |  |  |  |  |  |  |  |  |
| rs4564                                                     | 7   | 107347146     | 0.4  | 0.231       | DLG2  | 511        | 0.928(0.724,1.19) | 0.559  | 0.917(0.714,1.18) | 0.514   | 408 | 0.972(0.737,1.28) | 0.841                   | 0.966(0.731,1.28) | 0.711 | 408        | 0.861(0.641,1.16) | 0.324 | 0.855(0.634,1.15) | 0.221      | 407     | 0.064  | 0.199                | 0.008              | 0.199                |          |                    |  |  |          |  |  |  |  |  |  |  |  |                              |  |  |  |  |  |  |  |  |  |  |  |  |
| rs7889819                                                  | 7   | 107355534     | 0.32 | 0.13        | DLG2  | 512        | 0.959(0.709,1.19) | 0.559  | 0.959(0.709,1.19) | 0.552   | 409 | 0.972(0.729,1.3)  | 0.849                   | 0.967(0.725,1.3)  | 0.834 | 409        | 0.888(0.654,1.21) | 0.448 | 0.883(0.647,1.2)  | 0.433      | 408     | 0.039  | 0.6                  | 0.039              | 0.432                |          |                    |  |  |          |  |  |  |  |  |  |  |  |                              |  |  |  |  |  |  |  |  |  |  |  |  |
| rs10953555                                                 | 7   | 107368581     | 0.37 | 0.571       | DLG2  | 512        | 0.913(0.707,1.18) | 0.487  | 0.893(0.691,1.16) | 0.392   | 409 | 0.933(0.702,1.24) | 0.634                   | 0.925(0.694,1.23) | 0.595 | 409        | 0.927(0.683,1.26) | 0.625 | 0.914(0.672,1.24) | 0.57       | 408     | 0.066  | 0.188                | 0.066              | 0.182                |          |                    |  |  |          |  |  |  |  |  |  |  |  |                              |  |  |  |  |  |  |  |  |  |  |  |  |
| rs2237689                                                  | 7   | 107373079     | 0.44 | 0.282       | DLG2  | 512        | 0.985(0.76,1.28)  | 0.907  | 0.985(0.76,1.28)  | 0.907   | 409 | 0.926(0.675,1.27) | 0.597                   | 0.926(0.675,1.27) | 0.597 | 409        | 0.970(0.676,1.21) | 0.578 | 0.902(0.662,1.23) | 0.401      | 408     | 0.016  | 0.744                | 0.02               | 0.682                |          |                    |  |  |          |  |  |  |  |  |  |  |  |                              |  |  |  |  |  |  |  |  |  |  |  |  |
| rs3962342                                                  | 9   | 6496037       | 0.12 | 0.532       | GLDC2 | 512        | 1.25(0.863,1.82)  | 0.236  | 1.28(0.875,1.86)  | 0.207   | 409 | 1.20(0.79,1.81)   | 0.377                   | 1.23(0.813,1.86)  | 0.327 | 409        | 1.140(0.77,1.77)  | 0.274 | 1.180(0.75,1.86)  | 0.47       | 408     | -0.059 | 0.232                | -0.061             | 0.216                |          |                    |  |  |          |  |  |  |  |  |  |  |  |                              |  |  |  |  |  |  |  |  |  |  |  |  |
| rs10975622                                                 | 9   | 6508998       | 0.19 | 0.322       | GLDC2 | 512        | 1.180(0.87,1.61)  | 0.286  | 1.190(0.87,1.62)  | 0.284   | 409 | 1.190(0.87,1.62)  | 0.284                   | 1.190(0.87,1.62)  | 0.284 | 409        | 1.220(0.89,1.76)  | 0.297 | 1.250(0.86,1.82)  | 0.235      | 408     | -0.078 | 0.116                | -0.08              | 0.108                |          |                    |  |  |          |  |  |  |  |  |  |  |  |                              |  |  |  |  |  |  |  |  |  |  |  |  |
| rs1513055                                                  | 9   | 6513055       | 0.28 | 0.271       | GLDC2 | 512        | 1.070(0.813,1.4)  | 0.64   | 1.060(0.804,1.39) | 0.686   | 409 | 0.970(0.74,1.34)  | 0.984                   | 0.989(0.731,1.34) | 0.941 | 409        | 1.040(0.75,1.44)  | 0.799 | 1.030(0.74,1.43)  | 0.84       | 408     | -0.017 | 0.739                | -0.017             | 0.739                |          |                    |  |  |          |  |  |  |  |  |  |  |  |                              |  |  |  |  |  |  |  |  |  |  |  |  |
| rs11795213                                                 | 9   | 6515752       | 0.27 | 0.911       | GLDC2 | 512        | 0.825(0.61,1.1)   | 0.184  | 0.822(0.61,1.1)   | 0.179   | 409 | 0.835(0.61,1.14)  | 0.251                   | 0.827(0.605,1.13) | 0.232 | 409        | 0.931(0.672,1.29) | 0.671 | 0.901(0.647,1.26) | 0.542      | 408     | 0.049  | 0.32                 | 0.056              | 0.26                 |          |                    |  |  |          |  |  |  |  |  |  |  |  |                              |  |  |  |  |  |  |  |  |  |  |  |  |
| rs10975627                                                 | 9   | 6522069       | 0.14 | 0.584       | GLDC2 | 511        | 1.28(0.898,1.81)  | 0.175  | 1.31(0.918,1.86)  | 0.176   | 408 | 1.180(0.804,1.72) | 0.402                   | 1.210(0.816,1.76) | 0.366 | 408        | 1.120(0.796,1.58) | 0.364 | 1.120(0.823,1.53) | 0.369      | 407     | -0.078 | 0.217                | -0.079             | 0.212                |          |                    |  |  |          |  |  |  |  |  |  |  |  |                              |  |  |  |  |  |  |  |  |  |  |  |  |
| rs10975629                                                 | 9   | 6522343       | 0.47 | 0.375       | GLDC2 | 512        | 1.25(0.968,1.62)  | 0.0863 | 1.25(0.968,1.63)  | 0.0859  | 409 | 1.130(0.851,1.51) | 0.395                   | 1.130(0.849,1.52) | 0.394 | 409        | 1.190(0.876,1.62) | 0.263 | 1.21(0.888,1.66)  | 0.224      | 408     | -0.071 | 0.151                | -0.075             | 0.129                |          |                    |  |  |          |  |  |  |  |  |  |  |  |                              |  |  |  |  |  |  |  |  |  |  |  |  |
| rs7889819                                                  | 9   | 6522476       | 0.3  | 1           | GLDC2 | 512        | 1.110(0.846,1.46) | 0.447  | 1.110(0.841,1.46) | 0.465   | 409 | 1.010(0.752,1.3)  | 0.927                   | 1.074(1.36)       | 0.985 | 409        | 1.020(0.73,1.4)   | 0.92  | 1.010(0.729,1.4)  | 0.947      | 408     | -0.026 | 0.6                  | -0.027             | 0.581                |          |                    |  |  |          |  |  |  |  |  |  |  |  |                              |  |  |  |  |  |  |  |  |  |  |  |  |
| rs1061407                                                  | 9   | 6522543       | 0.34 | 0.845       | GLDC2 | 511        | 1.10(0.844,1.43)  | 0.481  | 1.090(0.836,1.43) | 0.355   | 408 | 0.998(0.748,1.33) | 0.987                   | 0.984(0.734,1.32) | 0.996 | 408        | 1.050(0.77,1.43)  | 0.754 | 1.050(0.77,1.43)  | 0.888      | 407     | -0.034 | 0.491                | -0.036             | 0.468                |          |                    |  |  |          |  |  |  |  |  |  |  |  |                              |  |  |  |  |  |  |  |  |  |  |  |  |
| rs2228098                                                  | 9   | 6523009       | 0.36 | 0.213       | GLDC2 | 512        | 0.992(0.77,1.28)  | 0.951  | 0.995(0.77,1.29)  | 0.937   | 409 | 0.973(0.73,1.28)  | 0.846                   | 0.970(0.732,1.29) | 0.833 | 409        | 0.940(0.698,1.27) | 0.683 | 0.941(0.695,1.27) | 0.847      | 408     | 0.014  | 0.782                | 0.012              | 0.811                |          |                    |  |  |          |  |  |  |  |  |  |  |  |                              |  |  |  |  |  |  |  |  |  |  |  |  |
| rs3818705                                                  | 9   | 6524435       | 0.17 | 0.757       | GLDC2 | 512        | 1.090(0.786,1.51) | 0.602  | 1.086(0.78,1.51)  | 0.671   | 409 | 0.961(0.673,1.37) | 0.826                   | 0.957(0.67,1.37)  | 0.812 | 409        | 1.190(0.806,1.76) | 0.376 | 1.190(0.806,1.76) | 0.378      | 408     | -0.024 | 0.626                | -0.022             | 0.626                |          |                    |  |  |          |  |  |  |  |  |  |  |  |                              |  |  |  |  |  |  |  |  |  |  |  |  |
| rs2282161                                                  | 9   | 6524507       | 0.19 | 0.885       | GLDC2 | 512        | 0.959(0.698,1.32) | 0.797  | 0.958(0.696,1.32) | 0.793   | 409 | 1.140(0.79,1.62)  | 0.488                   | 1.130(0.79,1.63)  | 0.495 | 409        | 0.982(0.699,1.44) | 0.925 | 0.981(0.666,1.45) | 0.923      | 408     | -0.024 | 0.624                | -0.024             | 0.629                |          |                    |  |  |          |  |  |  |  |  |  |  |  |                              |  |  |  |  |  |  |  |  |  |  |  |  |
| rs1527258                                                  | 9   | 6524844       | 0.48 | 0.288       | GLDC2 | 512        | 0.953(0.746,1.22) | 0.7    | 0.950(0.746,1.22) | 0.711   | 409 | 0.850(0.679,1.15) | 0.367                   | 0.897(0.685,1.18) | 0.431 | 409        | 0.910(0.689,1.22) | 0.548 | 0.925(0.692,1.24) | 0.596      | 408     | 0.05   | 0.311                | 0.047              | 0.341                |          |                    |  |  |          |  |  |  |  |  |  |  |  |                              |  |  |  |  |  |  |  |  |  |  |  |  |
| rs4742211                                                  | 9   | 6525499       | 0.18 | 0.376       | GLDC2 | 512        | 1.090(0.794,1.49) | 0.621  | 1.090(0.794,1.49) | 0.621   | 409 | 0.998(0.704,1.41) | 0.991                   | 0.999(0.704,1.41) | 0.995 | 409        | 0.881(0.613,1.27) | 0.495 | 0.878(0.609,1.27) | 0.49       | 408     | 0.007  | 0.889                | 0.005              | 0.891                |          |                    |  |  |          |  |  |  |  |  |  |  |  |                              |  |  |  |  |  |  |  |  |  |  |  |  |
| rs3765555                                                  | 9   | 6525974       | 0.29 | 0.914       | GLDC2 | 495        | 0.893(0.674,1.19) | 0.433  | 0.910(0.685,1.21) | 0.0801  | 395 | 0.882(0.651,1.2)  | 0.419                   | 0.902(0.663,1.23) | 0.151 | 395        | 0.829(0.602,1.14) | 0.253 | 0.841(0.608,1.16) | 0.42       | 394     | 0.066  | 0.189                | 0.063              | 0.21                 |          |                    |  |  |          |  |  |  |  |  |  |  |  |                              |  |  |  |  |  |  |  |  |  |  |  |  |
| rs2026972                                                  | 9   | 6528278       | 0.32 | 0.686       | GLDC2 | 512        | 0.847(0.645,1.11) | 0.231  | 0.862(0.655,1.13) | 0.285   | 409 | 0.823(0.615,1.1)  | 0.192                   | 0.842(0.626,1.13) | 0.253 | 409        | 0.768(0.564,1.05) | 0.095 | 0.782(0.572,1.07) | 0.125      | 408     | 0.085  | 0.085                | 0.081              | 0.103                |          |                    |  |  |          |  |  |  |  |  |  |  |  |                              |  |  |  |  |  |  |  |  |  |  |  |  |
| rs6817088                                                  | 9   | 6528416       | 0.2  | 1           | GLDC2 | 512        | 1.060(0.778,1.48) | 0.712  | 1.050(0.77,1.44)  | 0.746   | 409 | 1.190(0.87,1.68)  | 0.335                   | 1.170(0.823,1.66) | 0.38  | 409        | 1.160(0.79,1.7)   | 0.44  | 1.150(0.78,1.49)  | 0.484      | 408     | -0.046 | 0.34                 | -0.042             | 0.392                |          |                    |  |  |          |  |  |  |  |  |  |  |  |                              |  |  |  |  |  |  |  |  |  |  |  |  |
| rs4742213                                                  | 9   | 6529086       | 0.48 | 0.158       | GLDC2 | 512        | 0.910(0.714,1.16) | 0.449  | 0.921(0.72,1.18)  | 0.508   | 409 | 0.861(0.66,1.12)  | 0.271                   | 0.872(0.666,1.14) | 0.319 | 409        | 0.955(0.718,1.27) | 0.751 | 0.966(0.724,1.29) | 0.816      | 408     | 0.044  | 0.38                 | 0.042              | 0.403                |          |                    |  |  |          |  |  |  |  |  |  |  |  |                              |  |  |  |  |  |  |  |  |  |  |  |  |
| rs4518719                                                  | 9   | 6534084       | 0.31 | 0.352       | GLDC2 | 511        | 1.140(0.878,1.49) | 0.343  | 1.140(0.878,1.49) | 0.343   | 409 | 1.130(0.839,1.52) | 0.323                   | 1.130(0.839,1.52) | 0.323 | 409        | 1.090(0.79,1.5)   | 0.599 | 1.090(0.79,1.5)   | 0.599      | 408     | -0.056 | 0.263                | -0.056             | 0.263                |          |                    |  |  |          |  |  |  |  |  |  |  |  |                              |  |  |  |  |  |  |  |  |  |  |  |  |
| rs4419859                                                  | 9   | 6534765       | 0.37 | 0.39        | GLDC2 | 509        | 1.18(0.914,1.52)  | 0.205  | 1.170(0.91,1.51)  | 0.231   | 407 | 1.140(0.859,1.5)  | 0.37                    | 1.130(0.849,1.5)  | 0.309 | 407        | 1.140(0.842,1.54) | 0.395 | 1.130(0.831,1.54) | 0.252      | 406     | -0.072 | 0.146                | -0.071             | 0.154                |          |                    |  |  |          |  |  |  |  |  |  |  |  |                              |  |  |  |  |  |  |  |  |  |  |  |  |
| rs7963268                                                  | 9   | 6538269       | 0.34 | 0.278       | GLDC2 | 512        | 1.090(0.916,1.3)  | 0.212  | 1.180(0.96,1.5)   | 0.212   | 409 | 1.180(0.863,1.71) | 0.352                   | 1.180(0.863,1.71) | 0.352 | 409        | 1.090(0.82,1.44)  | 0.59  | 1.090(0.82,1.44)  | 0.59       | 408     | -0.072 | 0.146                | -0.072             | 0.148                |          |                    |  |  |          |  |  |  |  |  |  |  |  |                              |  |  |  |  |  |  |  |  |  |  |  |  |
| rs1041734                                                  | 9   | 6538392       | 0.5  | 0.158       | GLDC2 | 512        | 0.874(0.685,1.12) | 0.207  | 0.878(0.688,1.12) | 0.207   | 409 | 0.818(0.627,1.07) | 0.138                   |                   |       |            |                   |       |                   |            |         |        |                      |                    |                      |          |                    |  |  |          |  |  |  |  |  |  |  |  |                              |  |  |  |  |  |  |  |  |  |  |  |  |

|            |    |          |      |        |              |     |                   |               |                   |               |     |                   |               |                   |                |     |                    |               |                    |               |     |        |              |        |             |
|------------|----|----------|------|--------|--------------|-----|-------------------|---------------|-------------------|---------------|-----|-------------------|---------------|-------------------|----------------|-----|--------------------|---------------|--------------------|---------------|-----|--------|--------------|--------|-------------|
| rs1199442  | 9  | 6644049  | 0.16 | 1      | <i>GLDC</i>  | 512 | 0.895(0.634,1.26) | 0.527         | 0.911(0.644,1.29) | 0.596         | 409 | 0.930(0.638,1.36) | 0.706         | 0.948(0.646,1.38) | 0.769          | 409 | 1.180(0.781,1.79)  | 0.427         | 1.23(0.803,1.87)   | 0.341         | 408 | 0.003  | 0.951        | -0.002 | 0.96        |
| rs10815461 | 9  | 6644202  | 0.48 | 0.723  | <i>GLDC</i>  | 512 | 0.960(0.753,1.23) | 0.771         | 0.976(0.762,1.25) | 0.851         | 409 | 0.952(0.73,1.24)  | 0.716         | 0.958(0.733,1.25) | 0.754          | 409 | 1.075(0.76,1.34)   | 0.974         | 1.02(0.761,1.35)   | 0.916         | 408 | 0.003  | 0.512        | 0.029  | 0.553       |
| rs7031325  | 9  | 6645055  | 0.35 | 0.438  | <i>GLDC</i>  | 512 | 0.802(0.612,1.05) | 0.107         | 0.807(0.615,1.06) | 0.119         | 409 | 0.823(0.617,1.1)  | 0.186         | 0.814(0.609,1.09) | 0.166          | 409 | 0.933(0.686,1.27)  | 0.657         | 0.913(0.669,1.25)  | 0.568         | 408 | 0.061  | 0.219        | 0.063  | 0.206       |
| rs7860723  | 9  | 6646618  | 0.07 | 0.714  | <i>GLDC</i>  | 512 | 1.14(0.882,1.89)  | 0.627         | 1.13(0.88,1.92)   | 0.596         | 409 | 0.990(0.53,1.56)  | 0.728         | 0.928(0.599,1.36) | 0.787          | 409 | 0.852(0.484,1.5)   | 0.582         | 0.863(0.487,1.53)  | 0.616         | 408 | 0.051  | 0.301        | 0.05   | 0.317       |
| rs12528345 | 9  | 6648899  | 0.13 | 1      | <i>GLDC</i>  | 512 | 0.949(0.656,1.37) | 0.779         | 0.964(0.665,1.4)  | 0.845         | 409 | 0.940(0.658,1.49) | 0.965         | 1.0(0.62,1.51)    | 1              | 409 | 1.26(0.799,1.99)   | 0.313         | 1.3(0.818,2.07)    | 0.299         | 408 | -0.02  | 0.964        | -0.007 | 0.883       |
| rs9785246  | 9  | 6645732  | 0.27 | 0.266  | <i>GLDC</i>  | 512 | 0.932(0.708,1.23) | 0.613         | 0.929(0.704,1.23) | 0.603         | 409 | 0.958(0.71,1.29)  | 0.781         | 0.947(0.699,1.28) | 0.725          | 409 | 1.14(0.822,1.58)   | 0.431         | 1.1(0.794,1.54)    | 0.553         | 408 | -0.011 | 0.819        | -0.007 | 0.893       |
| rs1658970  | 9  | 6648452  | 0.13 | 0.0047 | <i>GLDC</i>  | 512 | 0.998(0.702,1.42) | 0.99          | 1.09(0.71,1.47)   | 0.893         | 409 | 1.09(0.74,1.67)   | 0.696         | 1.08(0.732,1.6)   | 0.696          | 409 | 0.885(0.592,1.35)  | 0.552         | 0.895(0.592,1.35)  | 0.603         | 408 | -0.004 | 0.959        | -0.003 | 0.959       |
| rs12525214 | 9  | 6655992  | 0.13 | 0.704  | <i>GLDC</i>  | 512 | 0.983(0.683,1.42) | 0.926         | 0.991(0.687,1.43) | 0.963         | 409 | 1.00(0.677,1.52)  | 0.951         | 1.02(0.676,1.53)  | 0.941          | 409 | 1.34(0.872,2.12)   | 0.195         | 1.36(0.858,2.16)   | 0.182         | 408 | -0.012 | 0.807        | -0.014 | 0.771       |
| rs820505   | 9  | 6659173  | 0.33 | 0.238  | <i>GLDC</i>  | 512 | 0.889(0.68,1.15)  | 0.59          | 0.881(0.67,1.15)  | 0.616         | 409 | 0.86(0.62,1.16)   | 0.124         | 0.81(0.608,1.08)  | 0.151          | 409 | 0.978(0.716,1.31)  | 0.837         | 0.978(0.72,1.29)   | 0.886         | 408 | 0.033  | 0.766        | 0.023  | 0.515       |
| rs1658957  | 9  | 6662096  | 0.5  | 0.791  | <i>GLDC</i>  | 512 | 1.321(0.2,1.7)    | <b>0.0327</b> | 1.331(0.3,1.72)   | <b>0.0264</b> | 409 | 1.26(0.96,1.68)   | 0.0944        | 1.27(0.967,1.68)  | 0.0836         | 409 | 0.948(0.709,1.27)  | 0.716         | 0.969(0.72,1.3)    | 0.834         | 408 | -0.022 | 0.616        | -0.025 | 0.617       |
| rs7871969  | 9  | 6663644  | 0.08 | 1      | <i>GLDC</i>  | 512 | 0.966(0.61,1.53)  | 0.884         | 0.982(0.618,1.56) | 0.94          | 409 | 0.734(0.45,1.19)  | 0.21          | 0.756(0.463,1.23) | 0.261          | 409 | 0.795(0.481,1.31)  | 0.373         | 0.828(0.498,1.38)  | 0.47          | 408 | 0.08   | 0.109        | 0.074  | 0.137       |
| rs10975734 | 9  | 6663699  | 0.29 | 0.589  | <i>GLDC</i>  | 512 | 1.431(0.8,1.9)    | <b>0.0115</b> | 1.431(0.8,1.9)    | <b>0.0128</b> | 409 | 1.531(1.0,1.9)    | <b>0.0078</b> | 1.541(1.0,2.12)   | <b>0.00676</b> | 409 | 1.14(0.816,1.59)   | 0.44          | 1.16(0.825,1.63)   | 0.391         | 408 | -0.054 | 0.278        | -0.059 | 0.236       |
| rs1759413  | 9  | 6663765  | 0.24 | 0.904  | <i>GLDC</i>  | 512 | 0.882(0.657,1.18) | 0.399         | 0.87(0.646,1.17)  | 0.354         | 409 | 0.87(0.64,1.2)    | 0.404         | 0.876(0.635,1.21) | 0.421          | 409 | 1.08(0.763,1.52)   | 0.663         | 1.08(0.76,1.52)    | 0.682         | 408 | -0.013 | 0.798        | -0.011 | 0.827       |
| rs11612037 | 12 | 55900039 | 0.04 | 0.203  | <i>SHMT2</i> | 512 | 0.737(0.389,1.4)  | 0.341         | 0.743(0.39,1.41)  | 0.356         | 409 | 0.871(0.437,1.74) | 0.695         | 0.891(0.446,1.78) | 0.743          | 409 | 0.452(0.234,0.912) | <b>0.0263</b> | 0.457(0.236,0.924) | <b>0.0291</b> | 408 | 0.075  | 0.11         | 0.072  | 0.147       |
| rs7489231  | 12 | 55900750 | 0.37 | 0.635  | <i>SHMT2</i> | 512 | 1.08(0.839,1.4)   | 0.541         | 1.09(0.845,1.41)  | 0.459         | 409 | 1.11(0.839,1.48)  | 0.452         | 1.1(0.827,1.47)   | 0.503          | 409 | 0.835(0.48,1.3)    | 0.0627        | 1.32(0.96,1.81)    | 0.0855        | 408 | -0.079 | 0.11         | -0.073 | 0.143       |
| rs7485577  | 12 | 5590227  | 0.3  | 0.205  | <i>SHMT2</i> | 511 | 1.22(0.935,1.59)  | 0.145         | 1.21(0.93,1.59)   | 0.237         | 408 | 1.22(0.907,1.65)  | 0.186         | 1.2(0.891,1.62)   | 0.287          | 408 | 1.41(1.01,1.97)    | <b>0.0384</b> | 1.39(0.99,1.94)    | 0.0604        | 407 | -0.109 | <b>0.028</b> | -0.102 | <b>0.04</b> |
| rs28365862 | 12 | 55909629 | 0.04 | 0.19   | <i>SHMT2</i> | 510 | 0.981(0.525,1.83) | 0.952         | 1.0(0.537,1.9)    | 0.393         | 407 | 1.12(0.552,2.28)  | 0.75          | 1.17(0.57,2.4)    | 0.375          | 407 | 1.15(0.529,2.52)   | 0.718         | 1.18(0.532,2.6)    | 0.659         | 406 | -0.009 | 0.853        | -0.015 | 0.769       |
| rs34095989 | 12 | 55913983 | 0.37 | 0.705  | <i>SHMT2</i> | 512 | 1.08(0.834,1.4)   | 0.552         | 1.1(0.84,1.43)    | 0.476         | 409 | 1.14(0.856,1.51)  | 0.377         | 1.14(0.856,1.51)  | 0.286          | 409 | 0.909(0.671,1.23)  | 0.535         | 0.947(0.697,1.29)  | 0.727         | 408 | 0      | -0.009       | 0.855  | 0           |
| rs16589857 | 12 | 55921325 | 0.47 | 0.109  | <i>SHMT2</i> | 509 | 0.86(0.675,1.1)   | 0.224         | 0.854(0.669,1.09) | 0.198         | 406 | 0.81(0.622,1.05)  | 0.116         | 0.803(0.615,1.05) | 0.11           | 406 | 1.03(0.776,1.34)   | 0.845         | 1.01(0.76,1.34)    | 0.197         | 405 | 0.02   | 0.695        | 0.025  | 0.618       |
| rs3204635  | 12 | 55923859 | 0.26 | 0.0292 | <i>SHMT2</i> | 512 | 0.871(0.663,1.13) | 0.321         | 0.859(0.652,1.13) | 0.277         | 409 | 0.791(0.588,1.06) | 0.112         | 0.785(0.582,1.06) | 0.112          | 409 | 0.825(0.604,1.13)  | 0.227         | 0.813(0.593,1.11)  | 0.198         | 408 | 0.071  | 0.153        | 0.072  | 0.144       |
| rs2911158  | 16 | 79648757 | 0.09 | 0.177  | <i>GCSH</i>  | 512 | 0.996(0.655,1.52) | 0.987         | 1.04(0.681,1.59)  | 0.858         | 409 | 1.19(0.733,1.93)  | 0.482         | 1.27(0.774,2.07)  | 0.347          | 409 | 1.02(0.688,1.72)   | 0.936         | 1.11(0.651,1.88)   | 0.704         | 408 | 0.014  | 0.771        | 0.006  | 0.904       |
| rs804896   | 16 | 79683580 | 0.25 | 0.155  | <i>GCSH</i>  | 512 | 1.01(0.767,1.34)  | 0.92          | 1.02(0.769,1.35)  | 0.905         | 409 | 1.1(0.809,1.5)    | 0.541         | 1.11(0.813,1.51)  | 0.512          | 409 | 0.922(0.664,1.28)  | 0.629         | 0.928(0.667,1.29)  | 0.661         | 408 | -0.052 | 0.521        | -0.035 | 0.481       |
| rs804905   | 16 | 79664463 | 0.25 | 0.633  | <i>GCSH</i>  | 512 | 0.944(0.708,1.26) | 0.695         | 0.951(0.712,1.27) | 0.732         | 409 | 1.01(0.734,1.39)  | 0.954         | 1.02(0.738,1.4)   | 0.919          | 409 | 0.891(0.636,1.25)  | 0.507         | 0.897(0.638,1.26)  | 0.534         | 408 | -0.004 | 0.911        | -0.006 | 0.911       |
| rs17763866 | 16 | 79670922 | 0.18 | 0.88   | <i>GCSH</i>  | 512 | 1.03(0.742,1.43)  | 0.855         | 1.01(0.722,1.4)   | 0.971         | 409 | 1.06(0.739,1.52)  | 0.752         | 1.03(0.714,1.48)  | 0.881          | 409 | 0.878(0.599,1.29)  | 0.505         | 0.841(0.571,1.24)  | 0.382         | 408 | -0.03  | 0.543        | -0.026 | 0.607       |
| rs10514515 | 16 | 79672822 | 0.08 | 0.766  | <i>GCSH</i>  | 511 | 0.943(0.599,1.49) | 0.801         | 0.993(0.627,1.57) | 0.905         | 409 | 1.13(0.672,1.91)  | 0.612         | 1.25(0.731,2.13)  | 0.416          | 409 | 1.06(0.605,1.87)   | 0.829         | 1.21(0.675,2.16)   | 0.522         | 408 | -0.007 | 0.884        | -0.018 | 0.716       |
| rs8177906  | 16 | 79678853 | 0.15 | 0.859  | <i>GCSH</i>  | 506 | 1.09(0.765,1.55)  | 0.635         | 1.05(0.737,1.5)   | 0.252         | 405 | 1.11(0.752,1.65)  | 0.59          | 1.08(0.729,1.61)  | 0.512          | 405 | 0.9(0.595,1.36)    | 0.621         | 0.858(0.564,1.31)  | 0.512         | 404 | -0.034 | 0.494        | -0.031 | 0.574       |
| rs8177876  | 16 | 79681775 | 0.07 | 0.314  | <i>GCSH</i>  | 510 | 0.815(0.5,1.33)   | 0.406         | 0.85(0.519,1.39)  | 0.242         | 407 | 0.944(0.542,1.64) | 0.839         | 1.04(0.59,1.83)   | 0.363          | 407 | 0.997(0.513,1.81)  | 0.993         | 1.12(0.608,2.05)   | 0.613         | 406 | 0.022  | 0.659        | 0.014  | 0.782       |
| rs8059692  | 16 | 79687994 | 0.07 | 0.313  | <i>GCSH</i>  | 511 | 0.804(0.494,1.31) | 0.375         | 0.849(0.519,1.39) | 0.259         | 409 | 0.971(0.556,1.7)  | 0.918         | 1.06(0.6,1.87)    | 0.845          | 409 | 0.961(0.53,1.74)   | 0.895         | 1.06(0.576,1.94)   | 0.857         | 408 | 0.021  | 0.669        | 0.014  | 0.744       |
| rs1869348  | 16 | 79699757 | 0.44 | 0.0202 | <i>GCSH</i>  | 512 | 1.03(0.807,1.3)   | 0.837         | 1.05(0.81,1.32)   | 0.786         | 409 | 0.957(0.737,1.24) | 0.742         | 0.959(0.737,1.25) | 0.754          | 409 | 0.998(0.754,1.32)  | 0.988         | 1.075(0.81,1.5)    | 0.999         | 408 | -0.02  | 0.685        | -0.026 | 0.667       |
| rs4520846  | 16 | 79699858 | 0.36 | 0.0841 | <i>GCSH</i>  | 510 | 1.04(0.813,1.34)  | 0.734         | 1.03(0.802,1.33)  | 0.382         | 407 | 1.03(0.786,1.36)  | 0.819         | 1.07(0.762,1.32)  | 0.41           | 407 | 0.979(0.731,1.31)  | 0.887         | 0.938(0.697,1.26)  | 0.934         | 406 | -0.028 | 0.577        | -0.024 | 0.636       |
| rs11647962 | 16 | 79703255 | 0.49 | 0.027  | <i>GCSH</i>  | 510 | 1.05(0.829,1.34)  | 0.674         | 1.06(0.837,1.35)  | 0.37          | 408 | 1.02(0.782,1.32)  | 0.902         | 1.04(0.788,1.38)  | 0.452          | 408 | 1.04(0.788,1.38)   | 0.765         | 1.05(0.788,1.39)   | 0.629         | 407 | -0.025 | 0.609        | -0.028 | 0.573       |
| rs8047530  | 16 | 79707371 | 0.49 | 0.0639 | <i>GCSH</i>  | 512 | 0.940(0.739,1.2)  | 0.612         | 0.940(0.739,1.2)  | 0.557         | 409 | 0.92(0.739,1.25)  | 0.773         | 0.955(0.733,1.25) | 0.736          | 409 | 0.963(0.726,1.28)  | 0.793         | 0.96(0.722,1.28)   | 0.78          | 408 | 0.023  | 0.647        | 0.026  | 0.597       |
| rs8050204  | 16 | 79714885 | 0.15 | 0.303  | <i>GCSH</i>  | 512 | 0.936(0.665,1.32) | 0.704         | 0.937(0.662,1.32) | 0.71          | 409 | 0.937(0.642,1.35) | 0.706         | 0.926(0.633,1.35) | 0.691          | 409 | 1.1(0.732,1.64)    | 0.655         | 1.1(0.726,1.67)    | 0.651         | 408 | 0.001  | 0.976        | 0.003  | 0.95        |
| rs4889242  | 16 | 79715021 | 0.49 | 0.594  | <i>GCSH</i>  | 507 | 1.08(0.84,1.38)   | 0.558         | 1.1(0.859,1.42)   | 0.223         | 405 | 1.03(0.783,1.35)  | 0.84          | 1.04(0.791,1.37)  | 0.277          | 405 | 1.05(0.781,1.4)    | 0.762         | 1.07(0.793,1.44)   | 0.586         | 404 | -0.03  | 0.545        | -0.035 | 0.481       |
| rs9745992  | 16 | 79716937 | 0.16 | 0.259  | <i>GCSH</i>  | 512 | 0.982(0.706,1.37) | 0.913         | 0.981(0.702,1.37) | 0.909         | 409 | 0.922(0.64,1.33)  | 0.661         | 0.915(0.63,1.33)  | 0.64           | 409 | 0.988(0.669,1.46)  | 0.952         | 0.986(0.66,1.47)   | 0.943         | 408 | 0.017  | 0.727        | 0.011  | 0.677       |
| rs8076336  | 17 | 18153338 | 0.41 | 0.144  | <i>SHMT1</i> | 512 | 1.06(0.831,1.36)  | 0.625         | 1.1(0.854,1.41)   | 0.464         | 409 | 1.05(0.804,1.37)  | 0.729         | 1.06(0.808,1.39)  | 0.684          | 409 | 1.03(0.776,1.37)   | 0.831         | 1.05(0.786,1.4)    | 0.74          | 408 | -0.029 | 0.554        | -0.034 | 0.49        |
| rs8080666  | 17 | 18161398 | 0.3  | 0.14   | <i>SHMT1</i> | 512 | 1.15(0.886,1.5)   | 0.289         | 1.19(0.908,1.56)  | 0.208         | 409 | 1.15(0.862,1.53)  | 0.345         | 1.16(0.871,1.56)  | 0.304          | 409 | 1.09(0.799,1.48)   | 0.591         | 1.13(0.823,1.55)   | 0.451         | 408 | -0.067 | 0.176        | -0.074 | 0.137       |
| rs1563632  | 17 | 18161494 | 0.33 | 1      | <i>SHMT1</i> | 512 | 0.91(0.698,1.19)  | 0.487         | 0.895(0.684,1.17) | 0.418         | 409 | 0.923(0.692,1.23) | 0.587         | 0.917(0.685,1.23) | 0.504          | 409 | 0.842(0.616,1.15)  | 0.282         | 0.8(0.6,1.15)      | 0.282         | 408 | 0.06   | 0.204        | 0.06   | 0.204       |
| rs16961153 | 17 | 18167825 | 0.26 | 0.0399 | <i>SHMT1</i> | 512 | 1.02(0.778,1.34)  | 0.887         | 1.07(0.762,1.31)  | 0.998         | 409 | 1.02(0.755,1.37)  | 0.919         | 1.0               |                |     |                    |               |                    |               |     |        |              |        |             |
